# Supplementary material for: An Optimized Transformation System and Functional Test of CYC-Like TCP Gene CpCYC in Chirita pumila (Gesneriaceae)
Source: MDPI journal article supplement (doi:10.3390/ijms22094544), 2021-04-27
Supplement: s1 [file s1]

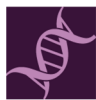

Article

# An Optimized Transformation System and Functional Test of CYC-Like TCP Gene *CpCYC* in *Chirita pumila* (Gesneriaceae)

Jing Liu <sup>1,†</sup>, Juan-Juan Wang <sup>1,2,†</sup>, Jie Wu <sup>1,2,†</sup>, Yang Wang <sup>1,2</sup>, Qi Liu <sup>1,2</sup>, Fang-Pu Liu <sup>1,2</sup>, Xia Yang <sup>1,\*</sup> and Yin-Zheng Wang <sup>1, 2,\*</sup>

<sup>1</sup> State Key Laboratory of Systematic and Evolutionary Botany, Institute of Botany, Chinese Academy of Sciences, Beijing 100093, China; liujing2010@ibcas.ac.cn (J.L.); jwang2@mpipz.mpg.de (J.-J.W.); daisywujie@mail.tsinghua.edu.cn (J.W.); wangyang2017@ibcas.ac.cn (Y.W.); liuqi2017@ibcas.ac.cn (Q.L.); liufangpu@ibcas.ac.cn (F.-P.L.)

<sup>2</sup> University of Chinese Academy of Sciences, Beijing 101408, China

\* Correspondence: yangxia@ibcas.ac.cn (X.Y.); wangyz@ibcas.ac.cn (Y.-Z.W.)

† These authors contributed equally to this article.

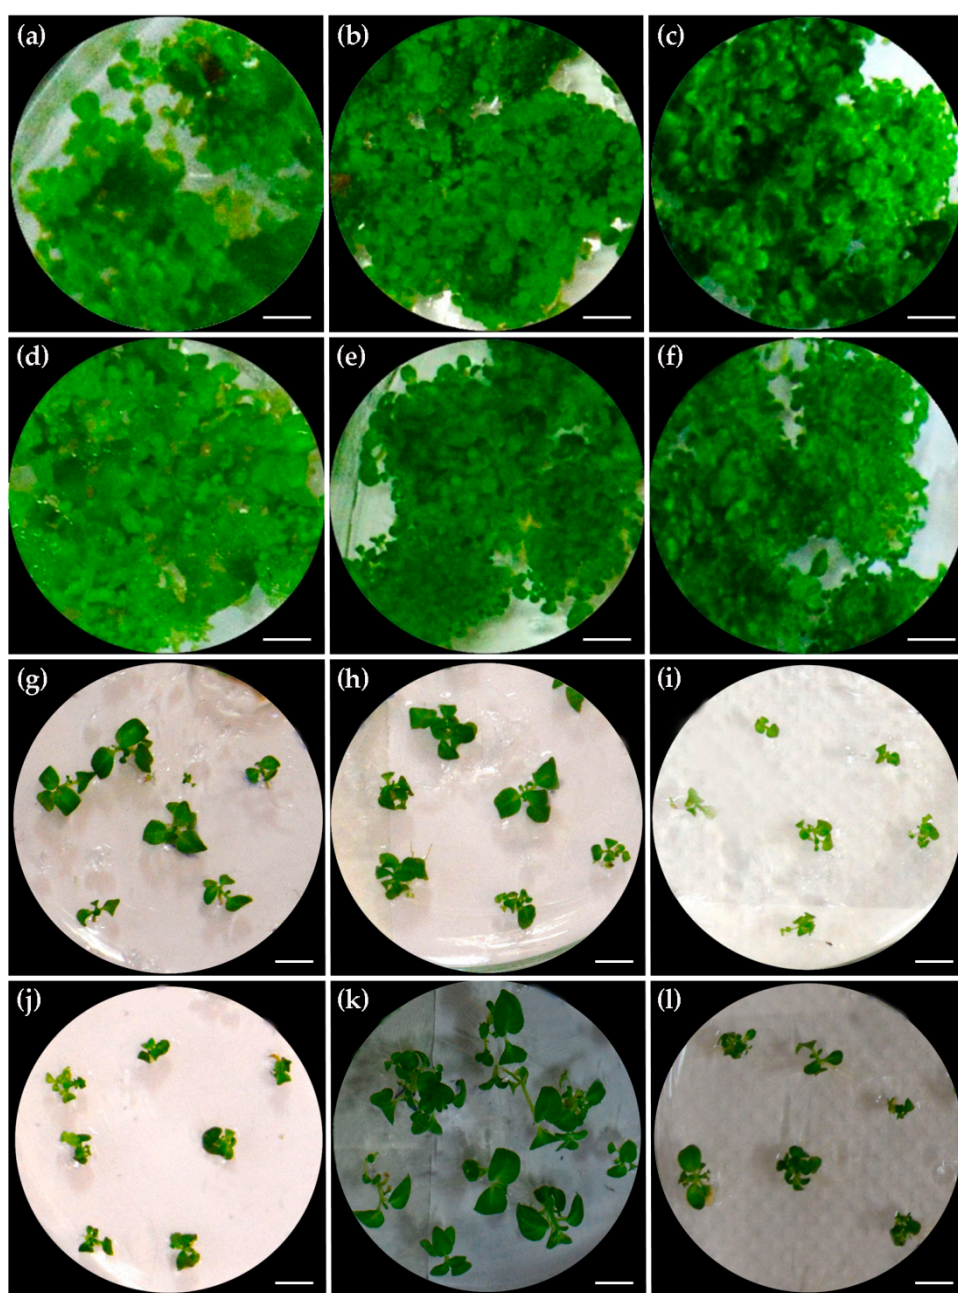

**Figure S1.** Effects of MS strength and sucrose concentration on *Chirita pumila* shoot regeneration and seedling elongation. (a) Adventitious shoots induced on MS medium containing 1% sucrose. (b) Adventitious shoots induced on MS medium containing 2% sucrose. (c) Adventitious shoots induced on MS medium containing 3% sucrose. (d) Adventitious shoots induced on 1/2 MS medium with 1% sucrose. (e) Adventitious shoots induced on 1/2 MS medium with 2% sucrose. (f) Adventitious shoots induced on 1/2 MS medium with 3% sucrose. (g) Seedlings grown on MS medium containing 1% sucrose. (h) Seedlings grown on MS medium containing 2% sucrose. (i) Seedlings grown on MS medium containing 3% sucrose. (j) Seedlings grown on 1/2 MS medium with 1% sucrose. (k) Seedlings grown on 1/2 MS medium with 2% sucrose. (l) Seedlings grown on 1/2 MS medium with 3% sucrose. Scale bars, 0.5cm in a–f; 1cm in g–l.

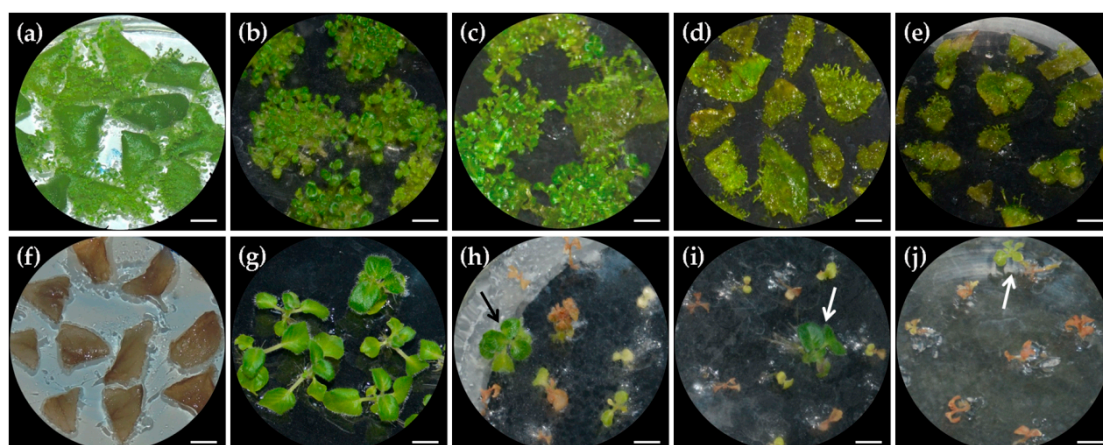

**Figure S2.** The optimal phosphinothricin (PPT) concentration for selecting positive *Chirita pumila* transgenic lines. (a) Wild-type explants cultured on medium without PPT. (b–e) The effect of PPT on bud induction of transfected explants. (b) 0 mg/L PPT; (c) 2 mg/L PPT; (d) 5 mg/L PPT; (e) 10 mg/L PPT. (f) Wild-type explants cultured on medium with 2 mg/L PPT. (g–j) The effect of PPT on the elongation of shoots from transfected explants. (g) 0 mg/L PPT; (h) 2 mg/L PPT; (i) 5 mg/L PPT; (j) 10 mg/L PPT. Arrows in h–j marked the positive transgenic seedlings confirmed by PCR. Scale bars, 0.5 cm.

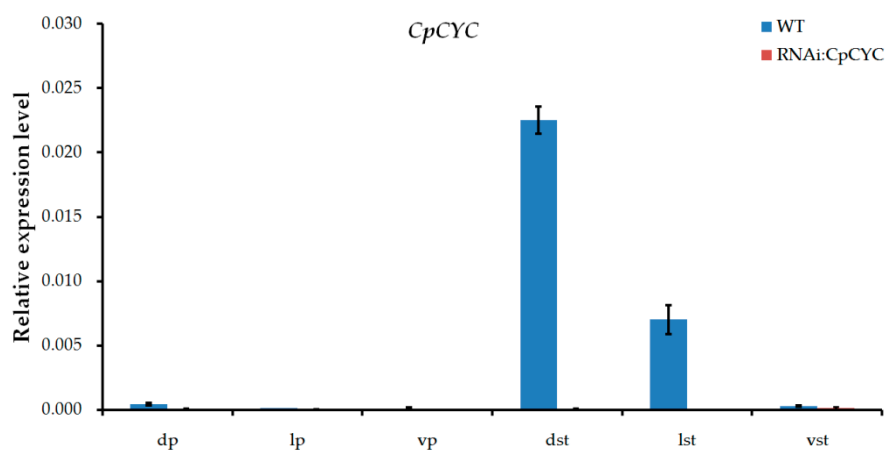

**Figure S3.** Expression analysis of *CpCYC* gene in wild-type (WT) and *RNAi:CpCYC* transgenic flowers using quantitative real-time PCR. *CpACTIN* was amplified as an internal reference. Data are mean  $\pm$  SD from three biological replicates. dp/lp/vp, dorsal/lateral/ventral petals; dst/lst/vst, dorsal/lateral/ventral stamens.

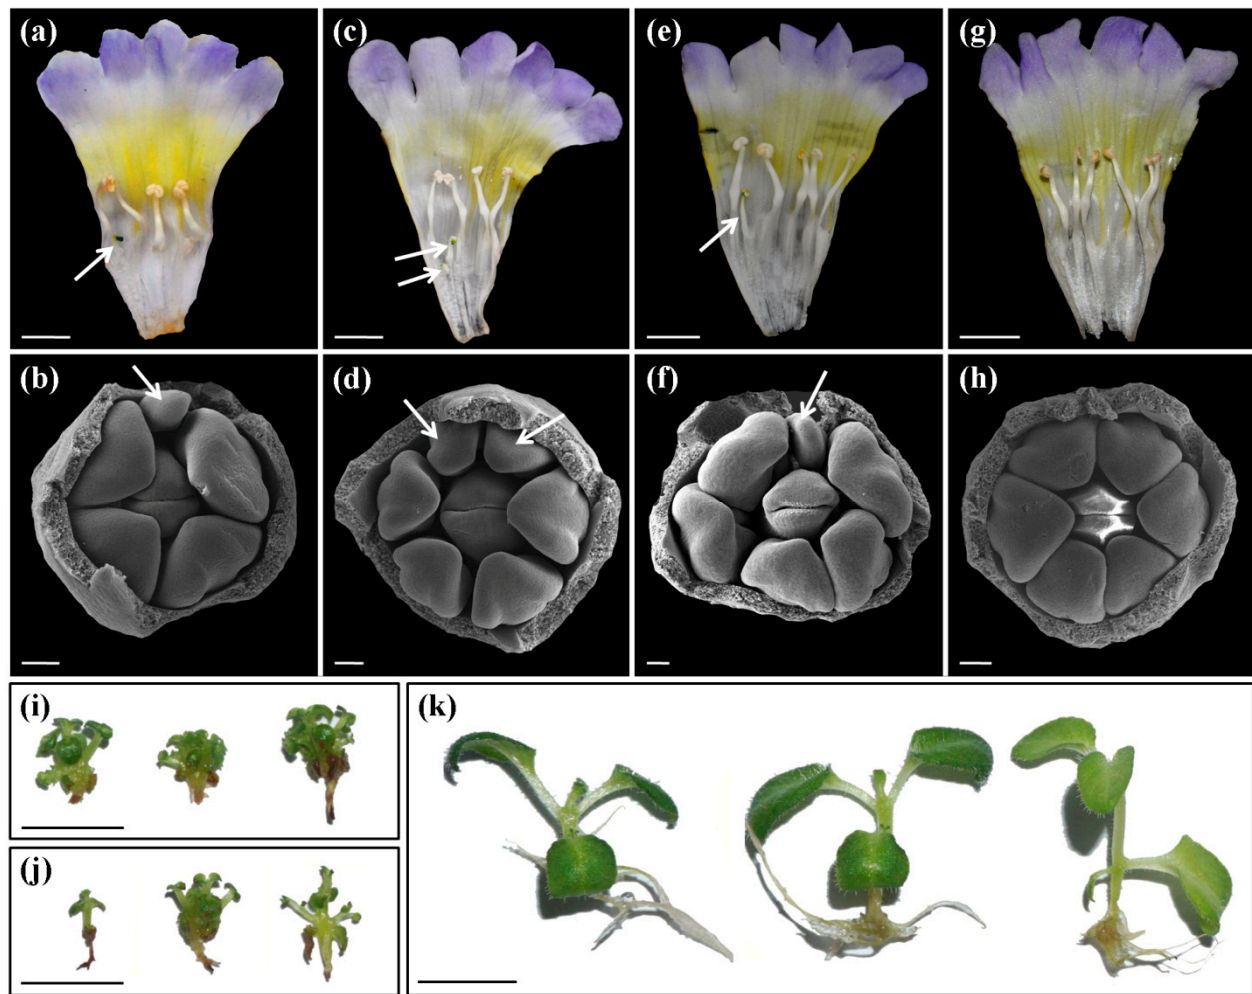

**Figure S4.** Varying degrees of actinomorphic flowers produced by T1 transgenic plants carrying *RNAi:CpCYC*. **(a,b)** A pentamerous flower with five identical petals and four fertile stamens. **(c,d)** A hexamerous flower with six identical petals and four fertile stamens. **(e,f)** A hexamerous flower with six identical petals and five fertile stamens. **(g,h)** A fully actinomorphic hexamerous flower with six identical petals and six fertile stamens. **(i,j)** The addition of 10 mg/L hygromycin inhibited the growth and development of wild-type **(i)** and negative T2 progenies of *RNAi:CpCYC* transgenic plants **(j)**. **(k)** Positive T2 progenies of *RNAi:CpCYC* transgenic plants grew healthily with well-developed root systems under the selection pressure of 10 mg/L hygromycin. Scale bars, 0.5cm in **a, c, e, g, i–k**; 50µm in **b, d, f, h**.

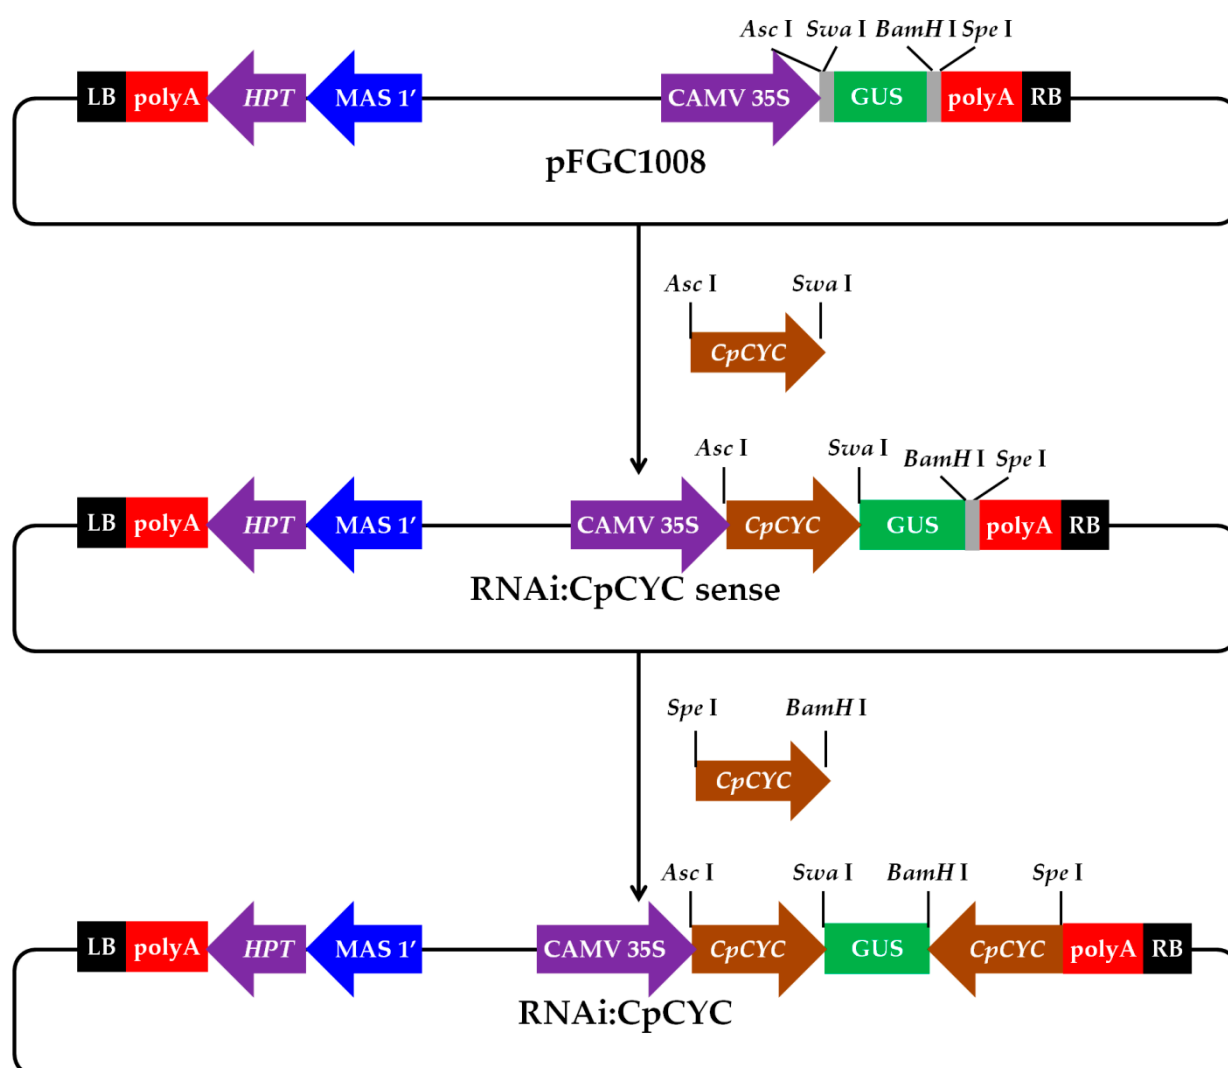

**Figure S5.** The diagram showing the construction of the RNAi:CpCYC vector. LB and RB mean left and right borders of the binary vector, respectively. HPT, the hygromycin phosphotransferase gene.

**Table S1.** Effect of different media on seed germination.

| MS Salt Strength | Sucrose Concentration | Days for Seed Germination <sup>†</sup> |
|------------------|-----------------------|----------------------------------------|
| <b>1/2 MS</b>    | <b>1%</b>             | <b>7</b>                               |
| 1/2 MS           | 2%                    | 9                                      |
| 1/2 MS           | 3%                    | 10                                     |
| MS               | 1%                    | 8                                      |
| MS               | 2%                    | 12                                     |
| MS               | 3%                    | 17                                     |

<sup>†</sup> Days for seed germination were defined as when green cotyledons can be clearly observed. The optimal medium for seed germination is highlighted by bold letters.

**Table S2.** Measurement of the optimal bactericidal antibiotics for *Agrobacterium* elimination.

| Antibiotics   | Concentration (mg/L) | Number of Explants | Number of Explants with Adventitious Shoots | Adventitious Shoot Induction Rate (%) |
|---------------|----------------------|--------------------|---------------------------------------------|---------------------------------------|
| Carbenicillin | 50                   | 45                 | 4                                           | 8.89                                  |
|               | 50                   | 45                 | 3                                           | 6.67                                  |
|               | 50                   | 45                 | 5                                           | 11.11                                 |
|               | 100                  | 45                 | 23                                          | 51.11                                 |
|               | 100                  | 45                 | 25                                          | 55.56                                 |
|               | 100                  | 45                 | 21                                          | 46.67                                 |
|               | 150                  | 45                 | 8                                           | 17.78                                 |
|               | 150                  | 45                 | 10                                          | 22.22                                 |
|               | 150                  | 45                 | 9                                           | 20.00                                 |
| Cefotaxime    | 50                   | 45                 | 19                                          | 42.22                                 |
|               | 50                   | 45                 | 22                                          | 48.89                                 |
|               | 50                   | 45                 | 16                                          | 35.56                                 |
|               | 100                  | 45                 | 21                                          | 46.67                                 |
|               | 100                  | 45                 | 17                                          | 37.78                                 |
|               | 100                  | 45                 | 17                                          | 37.78                                 |
|               | 150                  | 45                 | 29                                          | 64.44                                 |
|               | 150                  | 45                 | 26                                          | 57.78                                 |
|               | 150                  | 45                 | 26                                          | 57.78                                 |
| Timentin      | 50                   | 45                 | 10                                          | 22.22                                 |
|               | 50                   | 45                 | 12                                          | 26.67                                 |
|               | 50                   | 45                 | 8                                           | 17.78                                 |
|               | 100                  | 45                 | 3                                           | 6.67                                  |
|               | 100                  | 45                 | 6                                           | 13.33                                 |
|               | 100                  | 45                 | 5                                           | 11.11                                 |
|               | 150                  | 45                 | 12                                          | 26.67                                 |
|               | 150                  | 45                 | 15                                          | 33.33                                 |
|               | 150                  | 45                 | 9                                           | 20.00                                 |

**Table S3.** Effect of acetosyringone (AS) concentration on transformation rate.

| AS Concentration (μM) | Number of Inoculated Explants | Number of Positive Ex-plants | Transformation Rate (%) |
|-----------------------|-------------------------------|------------------------------|-------------------------|
| 0                     | 45                            | 0                            | 0                       |
|                       | 45                            | 0                            | 0                       |
|                       | 45                            | 0                            | 0                       |
| 50                    | 45                            | 5                            | 11.11                   |
|                       | 45                            | 6                            | 13.33                   |
|                       | 45                            | 5                            | 11.11                   |
| 100                   | 45                            | 3                            | 6.67                    |
|                       | 45                            | 3                            | 6.67                    |
|                       | 45                            | 4                            | 8.89                    |
| 200                   | 45                            | 0                            | 0                       |
|                       | 45                            | 0                            | 0                       |
|                       | 45                            | 0                            | 0                       |

**Table S4.** Effect of *Agrobacterium* strains on transformation rate.

| <i>Agrobacterium</i> Strains | Number of Inoculated Explants | Number of Positive Explants | Transformation Rate (%) |
|------------------------------|-------------------------------|-----------------------------|-------------------------|
| LBA4404                      | 39                            | 18                          | 46.15                   |
|                              | 39                            | 23                          | 58.97                   |
|                              | 40                            | 24                          | 60.00                   |
| GV3101                       | 39                            | 8                           | 20.51                   |
|                              | 39                            | 5                           | 12.82                   |
|                              | 40                            | 11                          | 27.50                   |
| EHA105                       | 39                            | 4                           | 10.26                   |
|                              | 39                            | 2                           | 5.13                    |
|                              | 40                            | 6                           | 15.00                   |



**Table S5.** Optimization of *Agrobacterium* infection condition for *C. pumila* leaf explants.

| OD600 Value | Infection Time (min) | Number of Explants | Number of Positive Explants | Transformation Rate (%) |
|-------------|----------------------|--------------------|-----------------------------|-------------------------|
| 0.4         | 10                   | 30                 | 0                           | 0                       |
|             | 10                   | 30                 | 0                           | 0                       |
|             | 10                   | 30                 | 0                           | 0                       |
|             | 20                   | 30                 | 4                           | 13.33                   |
|             | 20                   | 30                 | 3                           | 10.00                   |
|             | 20                   | 30                 | 2                           | 6.67                    |
|             | 30                   | 30                 | 2                           | 6.67                    |
|             | 30                   | 30                 | 1                           | 3.33                    |
|             | 30                   | 30                 | 3                           | 10.00                   |
| 0.6         | 10                   | 30                 | 0                           | 0                       |
|             | 10                   | 30                 | 0                           | 0                       |
|             | 10                   | 30                 | 0                           | 0                       |
|             | 20                   | 30                 | 3                           | 10.00                   |
|             | 20                   | 30                 | 5                           | 16.67                   |
|             | 20                   | 30                 | 4                           | 13.33                   |
|             | 30                   | 30                 | 0                           | 0                       |
|             | 30                   | 30                 | 0                           | 0                       |
|             | 30                   | 30                 | 0                           | 0                       |
| 0.8         | 10                   | 30                 | 1                           | 33.33                   |
|             | 10                   | 30                 | 0                           | 0                       |
|             | 10                   | 30                 | 0                           | 0                       |
|             | 20                   | 30                 | 1                           | 33.33                   |
|             | 20                   | 30                 | 0                           | 0                       |
|             | 20                   | 30                 | 0                           | 0                       |
|             | 30                   | 30                 | 0                           | 0                       |
|             | 30                   | 30                 | 0                           | 0                       |
|             | 30                   | 30                 | 0                           | 0                       |



**Table S6** Effect of co-culture temperature and duration on transformation rate.

| Co-culture Temperature (°C) | Co-culture Days | Number of Explants | Number of Positive Explants | Transformation Rate (%) |
|-----------------------------|-----------------|--------------------|-----------------------------|-------------------------|
| 22                          | 2               | 30                 | 10                          | 33.33                   |
|                             | 2               | 30                 | 12                          | 40.00                   |
|                             | 2               | 30                 | 8                           | 26.67                   |
|                             | 3               | 30                 | 5                           | 16.67                   |
|                             | 3               | 30                 | 4                           | 13.33                   |
|                             | 3               | 30                 | 6                           | 20.00                   |
| 24                          | 2               | 30                 | 5                           | 16.67                   |
|                             | 2               | 30                 | 4                           | 13.33                   |
|                             | 2               | 30                 | 3                           | 10.00                   |
|                             | 3               | 30                 | 13                          | 43.33                   |
|                             | 3               | 30                 | 10                          | 33.33                   |
|                             | 3               | 30                 | 10                          | 33.33                   |
| 26                          | 2               | 30                 | 5                           | 16.67                   |
|                             | 2               | 30                 | 7                           | 23.33                   |
|                             | 2               | 30                 | 6                           | 20.00                   |
|                             | 3               | 30                 | 15                          | 50.00                   |
|                             | 3               | 30                 | 11                          | 36.67                   |
|                             | 3               | 30                 | 10                          | 33.33                   |

**Table S7.** Segregation ratios of T2 generations from five representative T1 *RNAi:CpCYC* lines.

| Line | Number of Hyg-resistant Seedlings | Number of Hyg-sensitive Seedlings | Mendelian Segregation Ratio |
|------|-----------------------------------|-----------------------------------|-----------------------------|
| 3    | 192                               | 62                                | 3.10 : 1                    |
| 7    | 210                               | 68                                | 3.09 : 1                    |
| 40   | 78                                | 27                                | 2.89 : 1                    |
| 41   | 75                                | 29                                | 2.59 : 1                    |
| 64   | 67                                | 23                                | 2.91 : 1                    |

**Table S8.** Taxa and GenBank accession numbers of *rbcl*, *matk* and *ndhf* sequences for phylogenetic analyses.

| Taxa                           | <i>rbcl</i>             | <i>matk</i>             | <i>ndhf</i>               | Chloroplast<br>Genome |
|--------------------------------|-------------------------|-------------------------|---------------------------|-----------------------|
| <i>Antirrhinum majus</i>       | GQ997015                | AF375189                | GQ996983                  |                       |
| <i>Aquilegia caerulea</i>      | NC_041528.1:56936-58363 | NC_041528.1:2423-3952   | NC_041528.1:117630-119849 | NC_041528             |
| <i>Arabidopsis thaliana</i>    | NC_000932.1:54958-56397 | NC_000932.1:2056-3570   | NC_000932.1:110398-112638 | NC_000932             |
| <i>Aristolochia debilis</i>    | NC_036153.1:59349-60776 | NC_036153.1:1944-3488   | NC_036153.1:114840-117083 | NC_036153             |
| <i>Calceolaria uniflora</i>    | unavailable             | AJ580489                | unavailable               | unavailable           |
| <i>Capsella bursa-pastoris</i> | NC_009270.1:54493-55932 | NC_009270.1:2041-3621   | NC_009270.1:110158-112398 | NC_009270             |
| <i>Chirita pumila</i>          | KX527228                | KX526643                | KX526957                  | unavailable           |
| <i>Glycine max</i>             | NC_007942.1:5312-6739   | NC_007942.1:2011-3528   | NC_007942.1:124392-126644 | NC_007942             |
| <i>Helianthus annuus</i>       | NC_007977.1:54553-56010 | NC_007977.1:2065-3567   | NC_007977.1:124170-126401 | NC_007977             |
| <i>Lilium longiflorum</i>      | KC968977.1:52832-54274  | KC968977.1:1709-3247    | KC968977.1:108751-110973  | KC968977              |
| <i>Lotus japonicus</i>         | NC_002694.1:5158-6585   | NC_002694.1:2174-3700   | NC_002694.1:107092-109335 | NC_002694             |
| <i>Medicago truncatula</i>     | NC_003119.8:117623-1190 | NC_003119.8:120387-1219 | NC_003119.8:190-2424      | NC_003119             |
|                                | 50                      | 07                      |                           |                       |
| <i>Mimulus guttatus</i>        | NC_030212.1:55887-57341 | NC_030212.1:2115-3653   | NC_030212.1:109760-112009 | NC_030212             |
| <i>Nicotiana benthamiana</i>   | unavailable             | AB040014                | unavailable               | unavailable           |
| <i>Nigella damascena</i>       | NC_041537.1:57729-59156 | NC_041537.1:1997-3529   | NC_041537.1:112217-114430 | NC_041537             |
| <i>Oryza sativa</i>            | NC_031333.1:54051-55484 | NC_031333.1:1668-3203   | NC_031333.1:101393-103597 | NC_031333             |
| <i>Osmanthus fragrans</i>      | NC_042377.1:57266-58693 | NC_042377.1:2122-3699   | NC_042377.1:127396-129618 | NC_042377             |
| <i>Petunia hybrida</i>         | NC_040178.1:57566-58999 | NC_040178.1:2147-3670   | NC_040178.1:112621-114843 | NC_040178             |
| <i>Physalis floridana</i>      | NC_048514.1:57623-59056 | NC_048514.1:1976-3505   | NC_048514.1:112608-114830 | NC_048514             |
| <i>Pisum sativum</i>           | NC_014057.1:4712-6139   | NC_014057.1:1889-3418   | NC_014057.1:119721-121967 | NC_014057             |
| <i>Populus trichocarpa</i>     | NC_009143.1:55716-57143 | NC_009143.1:1981-3513   | NC_009143.1:112891-115173 | NC_009143             |
| <i>Rehmannia glutinosa</i>     | NC_034308.1:55917-57350 | NC_034308.1:2137-3672   | NC_034308.1:110398-112620 | NC_034308             |
| <i>Rosa hybrida</i>            | NC_044126.1:57054-58481 | NC_044126.1:2108-3619   | NC_044126.1:112272-114512 | NC_044126             |
| <i>Senecio vulgaris</i>        | NC_046693.1:54435-55892 | NC_046693.1:1959-3470   | NC_046693.1:123761-125986 | NC_046693             |
| <i>Sesamum indicum</i>         | NC_016433.2:56251-57684 | NC_016433.2:1972-3501   | NC_016433.2:110382-112637 | NC_016433             |
| <i>Sinningia speciosa</i>      | unavailable             | JX196113                | AY364309                  | unavailable           |
| <i>Solanum lycopersicum</i>    | NC_007898.3:56683-58116 | NC_007898.3:2124-3653   | NC_007898.3:111505-113718 | NC_007898             |
| <i>Vitis vinifera</i>          | NC_007957.1:59436-60863 | NC_007957.1:2016-3524   | NC_007957.1:59436-60863   | NC_007957             |
